# Supplementary material
Source: PubMed Central journal article supplement (PMC5833589)
Supplement: jamaotolaryngolheadnecksurg-144-65-s001.pdf [file jamaotolaryngolheadnecksurg-144-65-s001.pdf]

## Supplementary Online Content

Mahboubi H, Lin HW, Bhattacharyya N. Prevalence, characteristics, and treatment patterns of hearing difficulty in the united states [published online November 22, 2017]. *JAMA Otolaryngol Head Neck Surg*. doi:10.1001/jamaoto.2017.2223

**eTable 1.** Self-reported functional hearing status based on age decades

**eTable 2.** Reported etiology of hearing difficulty in adults with “less-than-good” hearing (universe: 18+ year olds with “less-than-good,” hearing not “excellent” or “good”, or those who reported “good” hearing, but hear worse in one ear than the other)

This supplementary material has been provided by the authors to give readers additional information about their work.

**Supplemental Table 1.** Self-reported functional hearing status based on age decades.

|                   | <b>Can hear whisper</b> | <b>Can hear normal voice</b> | <b>Can hear shouting voice</b> | <b>Can hear speaking loudly into good ear</b> | <b>Cannot hear speaking loudly into good ear</b> |
|-------------------|-------------------------|------------------------------|--------------------------------|-----------------------------------------------|--------------------------------------------------|
| <b>Age Decade</b> | <b>% ± SE*</b>          | <b>% ± SE*</b>               | <b>% ± SE*</b>                 | <b>% ± SE*</b>                                | <b>% ± SE*</b>                                   |
| 18-19 years       | 91.9 ± 1.3              | 7.2 ± 1.3                    | 0.8 ± 0.4                      | 0.0 ± 0.0                                     | 0.0 ± 0.0                                        |
| 20-29 years       | 92.4 ± 0.5              | 6.9 ± 0.4                    | 0.5 ± 0.1                      | 0.2 ± 0.1                                     | 0.1 ± 0.1                                        |
| 30-39 years       | 91.1 ± 0.6              | 7.2 ± 0.5                    | 1.4 ± 0.3                      | 0.3 ± 0.1                                     | 0.1 ± 0.0                                        |
| 40-49 years       | 86.2 ± 0.6              | 11.2 ± 0.6                   | 2.0 ± 0.2                      | 0.3 ± 0.1                                     | 0.3 ± 0.1                                        |
| 50-59 years       | 81.5 ± 0.8              | 15.2 ± 0.8                   | 2.4 ± 0.2                      | 0.5 ± 0.1                                     | 0.5 ± 0.1                                        |
| 60-69 years       | 72.4 ± 0.8              | 20.0 ± 0.8                   | 5.8 ± 0.4                      | 1.1 ± 0.3                                     | 0.7 ± 0.2                                        |
| 70-79 years       | 64.3 ± 1.1              | 24.3 ± 1.0                   | 8.7 ± 0.6                      | 1.4 ± 0.2                                     | 1.2 ± 0.2                                        |
| 80-89 years       | 48.2 ± 1.5              | 28.1 ± 1.3                   | 16.4 ± 1.1                     | 3.5 ± 0.5                                     | 3.8 ± 0.5                                        |

\* SE: standard error

**Supplemental Table 2.** Reported etiology of hearing difficulty in adults with “less-than-good” hearing (universe: 18+ year olds with “less-than-good,” hearing not “excellent” or “good”, or those who reported “good” hearing, but hear worse in one ear than the other).

|                                              | <b>N (Millions)</b> | <b>SE*</b> | <b>%</b> | <b>SE</b> |
|----------------------------------------------|---------------------|------------|----------|-----------|
| <b>Primary cause of hearing loss</b>         |                     |            |          |           |
| Aging                                        | 15.4                | 0.4        | 31.4     | 0.8       |
| Long term noise exposure                     | 12.3                | 0.4        | 25.2     | 0.7       |
| Other causes                                 | 5.9                 | 0.2        | 12.1     | 0.5       |
| Loud, brief noise (i.e. gunfire, explosion)  | 4.5                 | 0.3        | 9.3      | 0.5       |
| Otitis media or eardrum perforation          | 4.1                 | 0.2        | 8.3      | 0.5       |
| Ear injury or head/neck trauma               | 1.5                 | 0.1        | 3.0      | 0.3       |
| Congenital, genetic                          | 1.3                 | 0.1        | 2.6      | 0.3       |
| Sudden hearing loss, idiopathic              | 1.1                 | 0.2        | 2.3      | 0.5       |
| Congenital, other                            | 0.6                 | 0.1        | 1.1      | 0.2       |
| After birth, infectious disease              | 0.5                 | <0.1       | 1.1      | 0.2       |
| Ear disease (i.e. otosclerosis or Meniere’s) | 0.5                 | <0.1       | 1.0      | 0.2       |
| Ear surgery                                  | 0.4                 | 0.1        | 0.8      | 0.2       |
| Medications                                  | 0.4                 | <0.1       | 0.7      | 0.1       |
| Congenital, infectious                       | 0.3                 | <0.1       | 0.6      | 0.1       |
| Brain tumor (i.e. vestibular schwannoma)     | 0.2                 | <0.1       | 0.3      | 0.1       |

\* SE: standard error
